# Supplementary material
Source: PubMed Central journal article supplement (PMC2597440)
Supplement: NIHMS60977-supplement-si20060110_045.pdf [file NIHMS60977-supplement-si20060110_045.pdf]

Supporting information for JM 050120

**SYNTHESIS OF BIPHENYLTRIENES AS PROBES FOR  $\beta$ -  
AMYLOID PLAQUES**

Zhi-Ping Zhuang,<sup>1</sup> Mei-Ping Kung,<sup>1</sup> and Hank F. Kung<sup>1,2</sup>

Departments of Radiology,<sup>1</sup> and Pharmacology,<sup>2</sup> University of Pennsylvania

**Elemental Analysis:**

| Compound                                                                  | C     |       | H     |       | N     |       |
|---------------------------------------------------------------------------|-------|-------|-------|-------|-------|-------|
|                                                                           | calcd | found | calcd | found | calcd | found |
| 4a (C <sub>20</sub> H <sub>20</sub> O <sub>2</sub> ·1/8H <sub>2</sub> O)  | 81.53 | 81.24 | 6.93  | 6.84  |       |       |
| 4b (C <sub>26</sub> H <sub>32</sub> O <sub>6</sub> )                      | 70.89 | 70.83 | 7.32  | 7.31  |       |       |
| 4c (C <sub>18</sub> H <sub>16</sub> O <sub>2</sub> ·1/2H <sub>2</sub> O)  | 79.10 | 78.83 | 6.27  | 6.02  |       |       |
| 4d (C <sub>18</sub> H <sub>14</sub> N <sub>2</sub> O <sub>4</sub> )       | 67.08 | 67.18 | 4.38  | 4.40  | 8.69  | 8.57  |
| 4e (C <sub>18</sub> H <sub>18</sub> N <sub>2</sub> ·3/8H <sub>2</sub> O)  | 80.34 | 80.09 | 7.02  | 7.10  | 10.41 | 10.41 |
| 4f (C <sub>20</sub> H <sub>22</sub> N <sub>2</sub> ·H <sub>2</sub> O)     | 77.89 | 78.12 | 7.84  | 7.50  | 9.08  | 8.80  |
| 4g (C <sub>22</sub> H <sub>26</sub> N <sub>2</sub> ·3/2H <sub>2</sub> O)  | 76.48 | 76.55 | 8.46  | 8.65  | 8.11  | 7.89  |
| 4h (C <sub>20</sub> H <sub>21</sub> FN <sub>2</sub> ·7/8H <sub>2</sub> O) | 74.10 | 74.04 | 7.07  | 6.92  | 8.64  | 8.41  |
